# Supplementary material for: IL-17RA Signaling in Prx1+ Mesenchymal Cells Influences Fracture Healing in Mice
Source: MDPI journal article supplement (doi:10.3390/ijms25073751), 2024-03-28
Supplement: s1 [file s1]

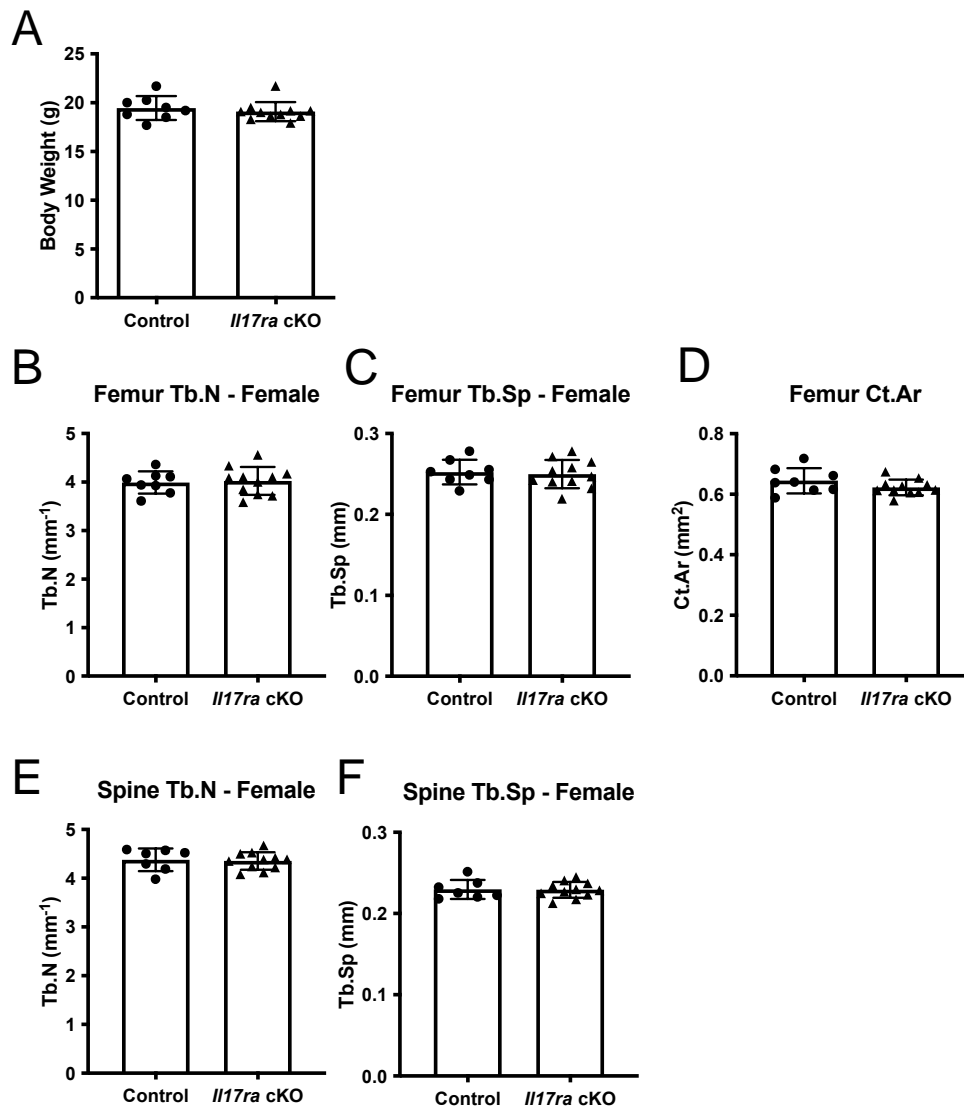

**Supplementary Figure S1.** Body weight and  $\mu$ CT indices from female mice.

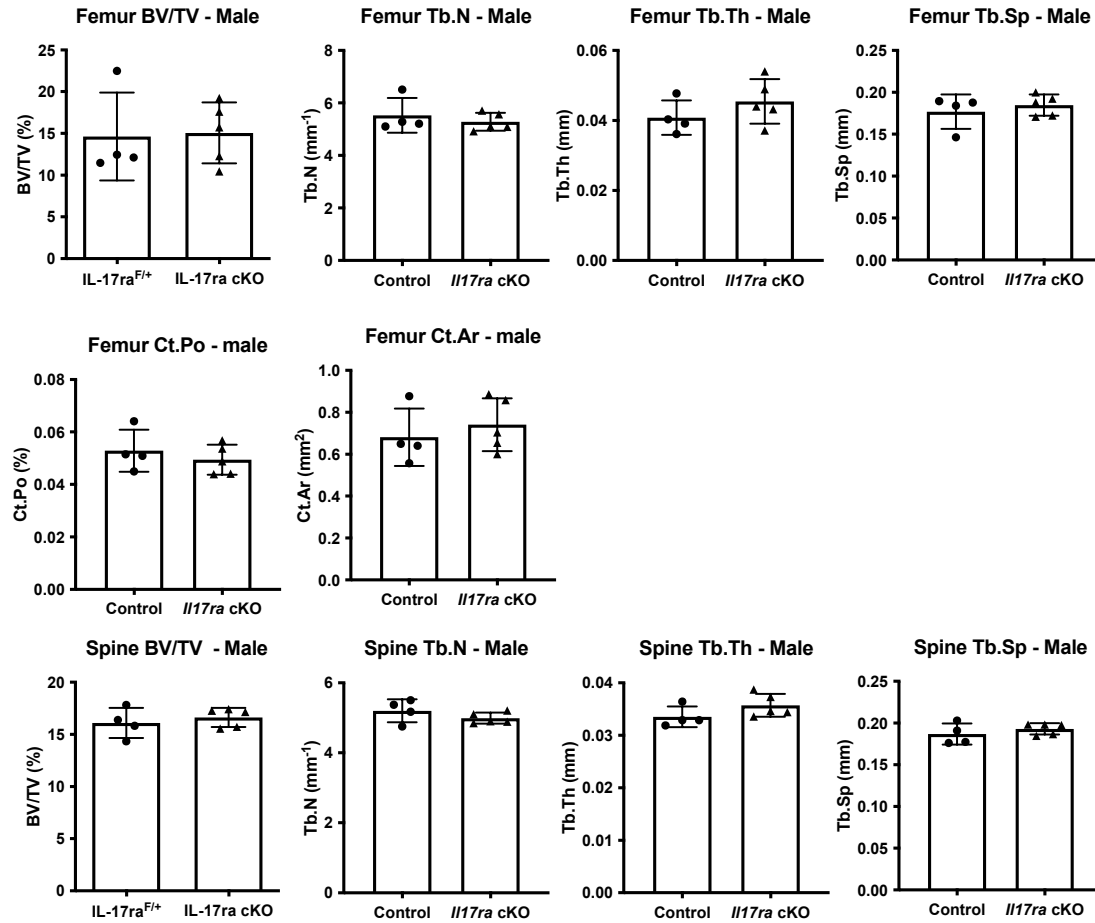

**Supplementary Figure S2.**  $\mu$ CT indices from male mice.
