# Supplementary material for: IL-17RA Signaling in Prx1+ Mesenchymal Cells Influences Fracture Healing in Mice
Source: MDPI journal article supplement (doi:10.3390/ijms25073751), 2024-03-28
Supplement: s1 [file s1]

**Supplementary Table S1.** Primer sequences.

| Gene           | Sequence (5'→3')                               | Product Size (bp) |
|----------------|------------------------------------------------|-------------------|
| <i>Runx2</i>   | GACATCCCCATCCATCCACT<br>TGAGAGAGGAAGGCCAGAGG   | 140               |
| <i>Osx</i>     | ACTGGCTAGGTGGTGGTCAG<br>GGTAGGGAGCTGGGTTAAGG   | 135               |
| <i>Cola1</i>   | TGTCCCAACCCCCAAAGAC<br>CCCTCGACTCCTACATCTTCTGA | 92                |
| <i>Bglap</i>   | TGCTTGTGACGAGCTATCAG<br>GAGGACAGGGAGGATCAAGT   | 149               |
| <i>IL-17ra</i> | AGTGTTTCCTCTACCCAGCAC<br>GAAAACCGCCACCGCTTAC   | 194               |
| <i>β-actin</i> | AGATGTGGATCAGCAAGCAG<br>GCGCAAGTTAGGTTTTGTCA   | 125               |
